# Supplementary material for: The response of mesophyll conductance to short-term variation in CO2 in the C4 plants Setaria viridis and Zea mays
Source: PubMed Central journal article supplement (PMC6018935; doi:10.1093/jxb/erx464), 2018-02-21
Supplement: erx464_suppl_supplementary_figures.pdf [file erx464_suppl_supplementary_figures.pdf]

**Supplementary Figure S1.** Values for  $p\text{CO}_2$  in the mesophyll ( $C_m$ , Pa) calculated with the carbonic anhydrase limited calculations across the  $p\text{CO}_2$  inside the leaf intercellular spaces ( $C_i$ , Pa). Data are for *Setaria viridis* (black circles) at three temperatures ( $T_L = 40$  °C, panel A;  $T_L = 25$  °C, panel B;  $T_L = 10$  °C, panel C) and for *Zea mays* (grey squares) at  $T_L = 25$  °C. Values are means  $\pm$  1 SE,  $n = 4$  in *Setaria* and  $n = 3$  in *Zea*. Arrows indicate values at ambient  $p\text{CO}_2$ .

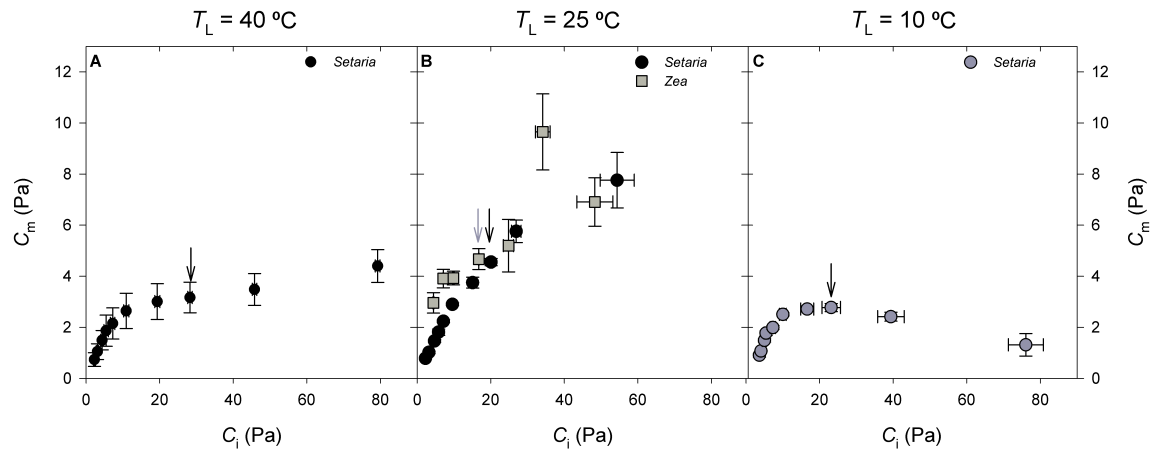

**Supplementary Figure S2.** Description of the models used to evaluate the effect of mesophyll conductance ( $g_m$ ) in calculations of leakiness ( $\phi$ ). Model 1: uses *in-vitro*  $V_{pmax}$  and  $g_m$  finite and equal to the values presented in Fig. 3 of the main manuscript; Model 2: uses *in-vivo*  $V_{pmax}$  and  $g_m$  infinite; Model 3: is the same than Model 1 but the solution was only constrained by  $A$  and not  $\Delta^{13}C$ ; Model 4: is the same than Model 1 but with  $V_p = \min \left( V_{pr}, \frac{[HCO_3^-]V_{pmax}}{[HCO_3^-] + K_p} \right)$ , where  $V_{pr} = 64$  and  $59 \mu\text{mol m}^{-2}\text{s}^{-1}$  in *Setaria* and *Zea*, respectively. Several parameters that describe  $C_4$  photosynthesis are plotted across the  $pCO_2$  inside the leaf intercellular spaces ( $C_i$ , Pa), namely: maximal PEP carboxylation rate ( $V_{pmax}$ ,  $\mu\text{mol m}^{-2}\text{s}^{-1}$ ), mesophyll conductance ( $g_m$ ,  $\mu\text{mol m}^{-2}\text{s}^{-1}\text{Pa}^{-1}$ ), maximal Rubisco carboxylation rate ( $V_{cmax}$ ,  $\mu\text{mol m}^{-2}\text{s}^{-1}$ ), bundle-sheath conductance ( $g_{bs}$ ,  $\mu\text{mol m}^{-2}\text{s}^{-1}\text{Pa}^{-1}$ ),  $pCO_2$  in the bundle-sheath cells ( $C_{bs}$ , Pa), PEP carboxylation rate ( $V_p$ ,  $\mu\text{mol m}^{-2}\text{s}^{-1}$ ) and Rubisco carboxylation rate ( $V_c$ ,  $\mu\text{mol m}^{-2}\text{s}^{-1}$ ). All models applied the CA-limited calculations to *Setaria viridis* and *Zea mays* data measured at 25 °C.

The models of  $A$  (photosynthetic rate,  $\mu\text{mol m}^{-2}\text{s}^{-1}$ ) and  $\Delta^{13}C$  ( $^{13}C$  discrimination, ‰) include four variables –  $C_m$ ,  $V_{pmax}$ ,  $g_{bs}$  and  $V_{cmax}$  – that are grouped in the pairs ( $C_m$ ,  $V_{pmax}$ ) and ( $g_{bs}$ ,  $V_{cmax}$ ), with the exception of the crossed term  $g_{bs}C_m$  that is very small. This explains why one pair can be calculated as a function of the other pair rather than as a function of the individual values for each variable (detailed explanation can be found in Ubierna *et al.*, 2017). To illustrate that individual values chosen for  $V_{cmax}$  and  $g_{bs}$  do not affect the calculation of  $g_m$  or  $\phi$ , the four models were applied in two set of conditions: considering  $V_{cmax}$  either variable (**A**) or constant (**B**) with  $pCO_2$ . In **A** we used *in-vivo*  $V_{cmax}$ , and in **B** we used  $V_{cmax} = 34$  and  $31 \mu\text{mol m}^{-2}\text{s}^{-1}$  for *Setaria* and *Zea*, respectively. Therefore, Figure S2 includes the following sub-figures:

Fig. S2.A.1. Models 1 to 4 in *Setaria viridis* when  $V_{cmax}$  is variable with  $pCO_2$

Fig. S2.A.2. Models 1 to 4 in *Zea mays* when  $V_{cmax}$  is variable with  $pCO_2$

Fig. S2.B.1. Models 1 to 4 in *Setaria viridis* when  $V_{cmax}$  is constant with  $pCO_2$

Fig. S2.B.2. Models 1 to 4 in *Zea mays* when  $V_{cmax}$  is constant with  $pCO_2$

Figure S2.A.1 Models 1 to 4 in *Setaria viridis* when  $V_{\text{cmax}}$  is variable with  $p\text{CO}_2$

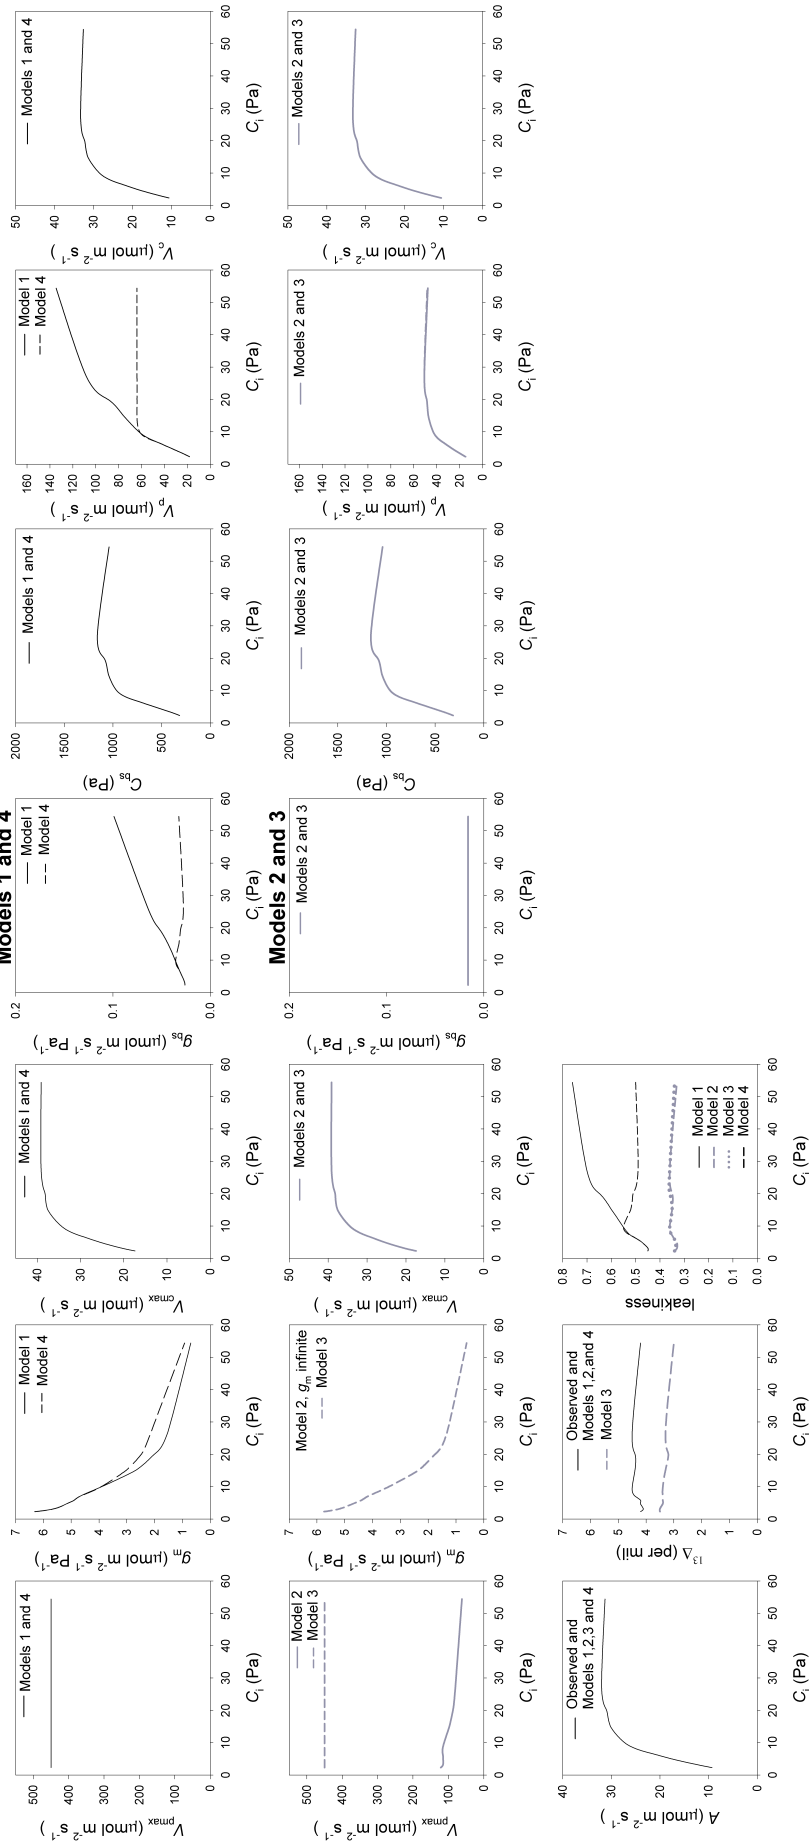

Figure S2.A.2 Models 1 to 4 in *Zea mays* when  $V_{cmax}$  is variable with  $pCO_2$

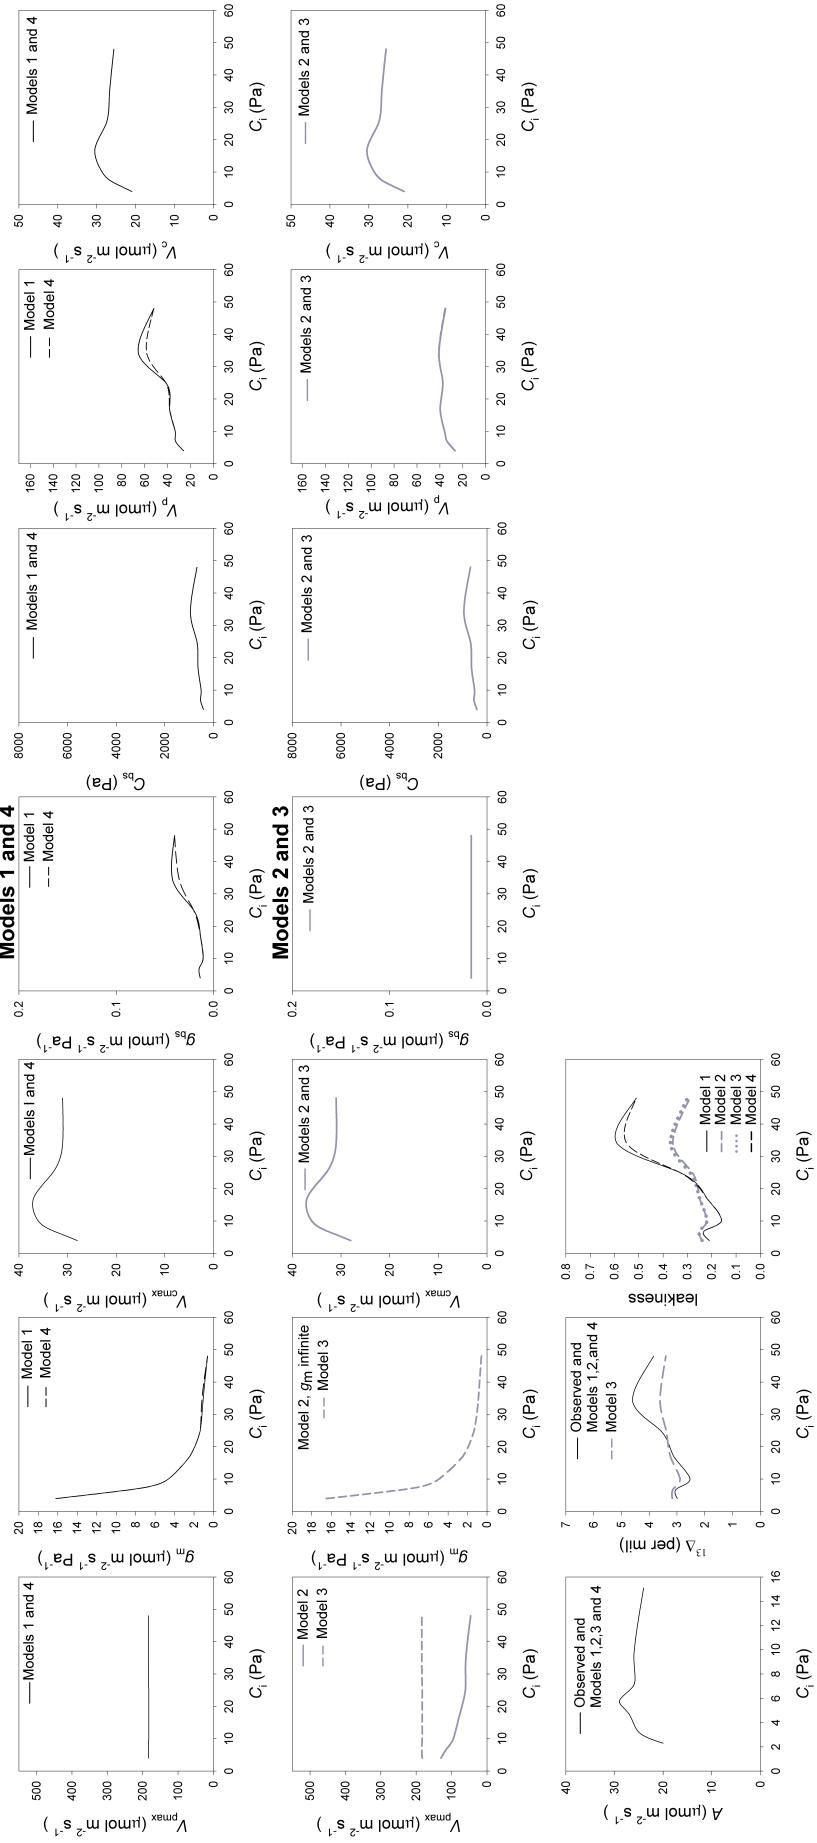

Figure S2.B.1 Models 1 to 4 in *Setaria viridis* when  $V_{cmax}$  is constant with  $pCO_2$

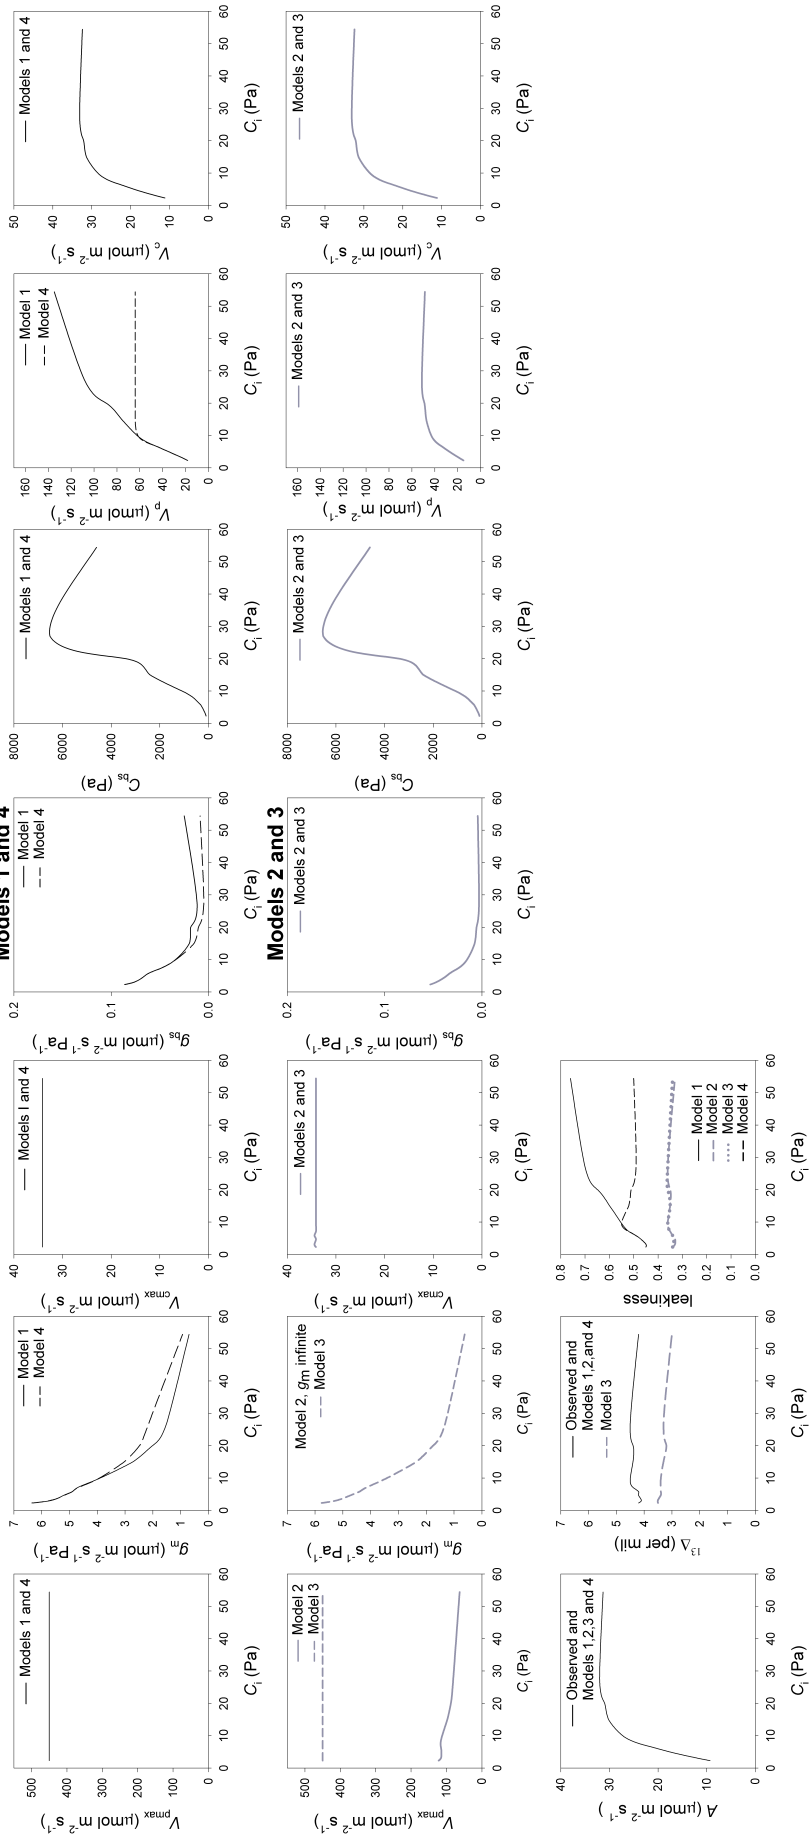

Figure S2.B.2 Models 1 to 4 in Zea mays when  $V_{cmax}$  is constant with  $pCO_2$

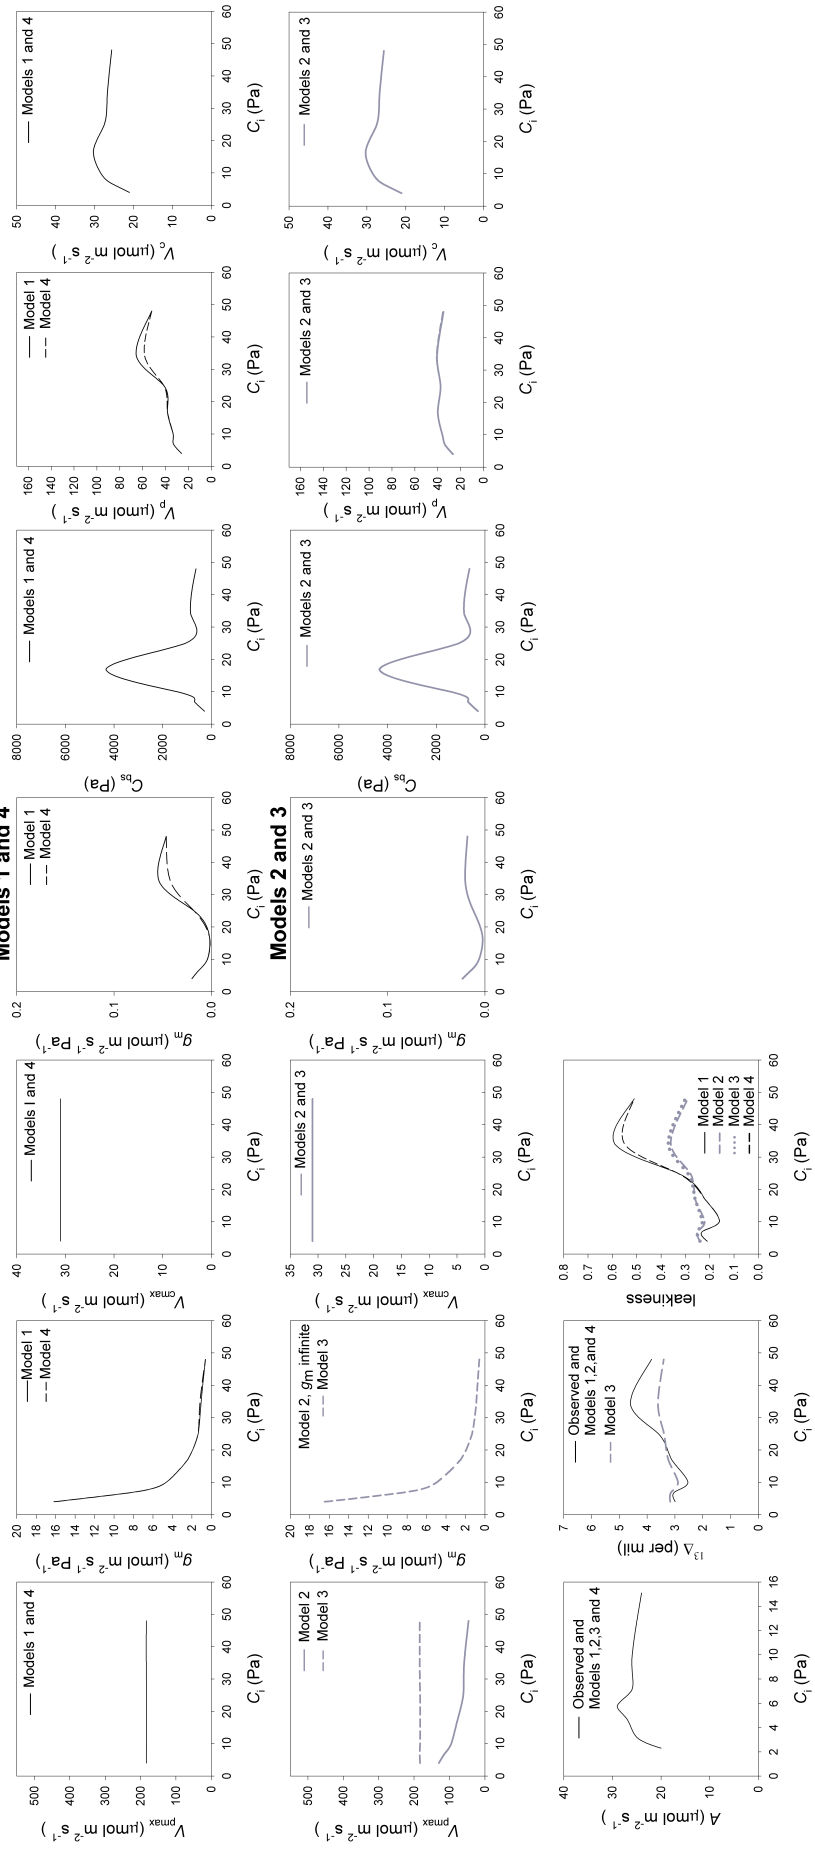

**Supplementary Figure S3.** Sensitivity of calculations of carbonic anhydrase limited mesophyll conductance (CA-lim  $g_m$ ) in *Setaria viridis* to uncertainty in values for Michaelis-Menten constant of PEPC ( $K_p$ , **A - C**), rate constant of CA for CO<sub>2</sub> ( $K_{CA}$ , **D - F**), Michaelis-Menten constant of Rubisco ( $K_C$ , **G- I**), and maximal PEP carboxylation rate ( $V_{pmax}$ , **J - L**). Calculations were performed at three temperatures (10, 25 and 40 °C) and three  $pCO_2$  ( $C_a = 93, 38$  and  $5-10$  Pa for high - solid line -, ambient - dashed line -, and low - dashed and dotted line -, respectively). The numbers on top of each panel represent the actual parameter value at each temperature. Each parameter was varied  $\pm 20$  and  $\pm 50\%$  of its actual value and the % change in  $g_m$  was calculated by comparing CA-lim  $g_m$  results calculated with the assumed versus the actual parameter value.

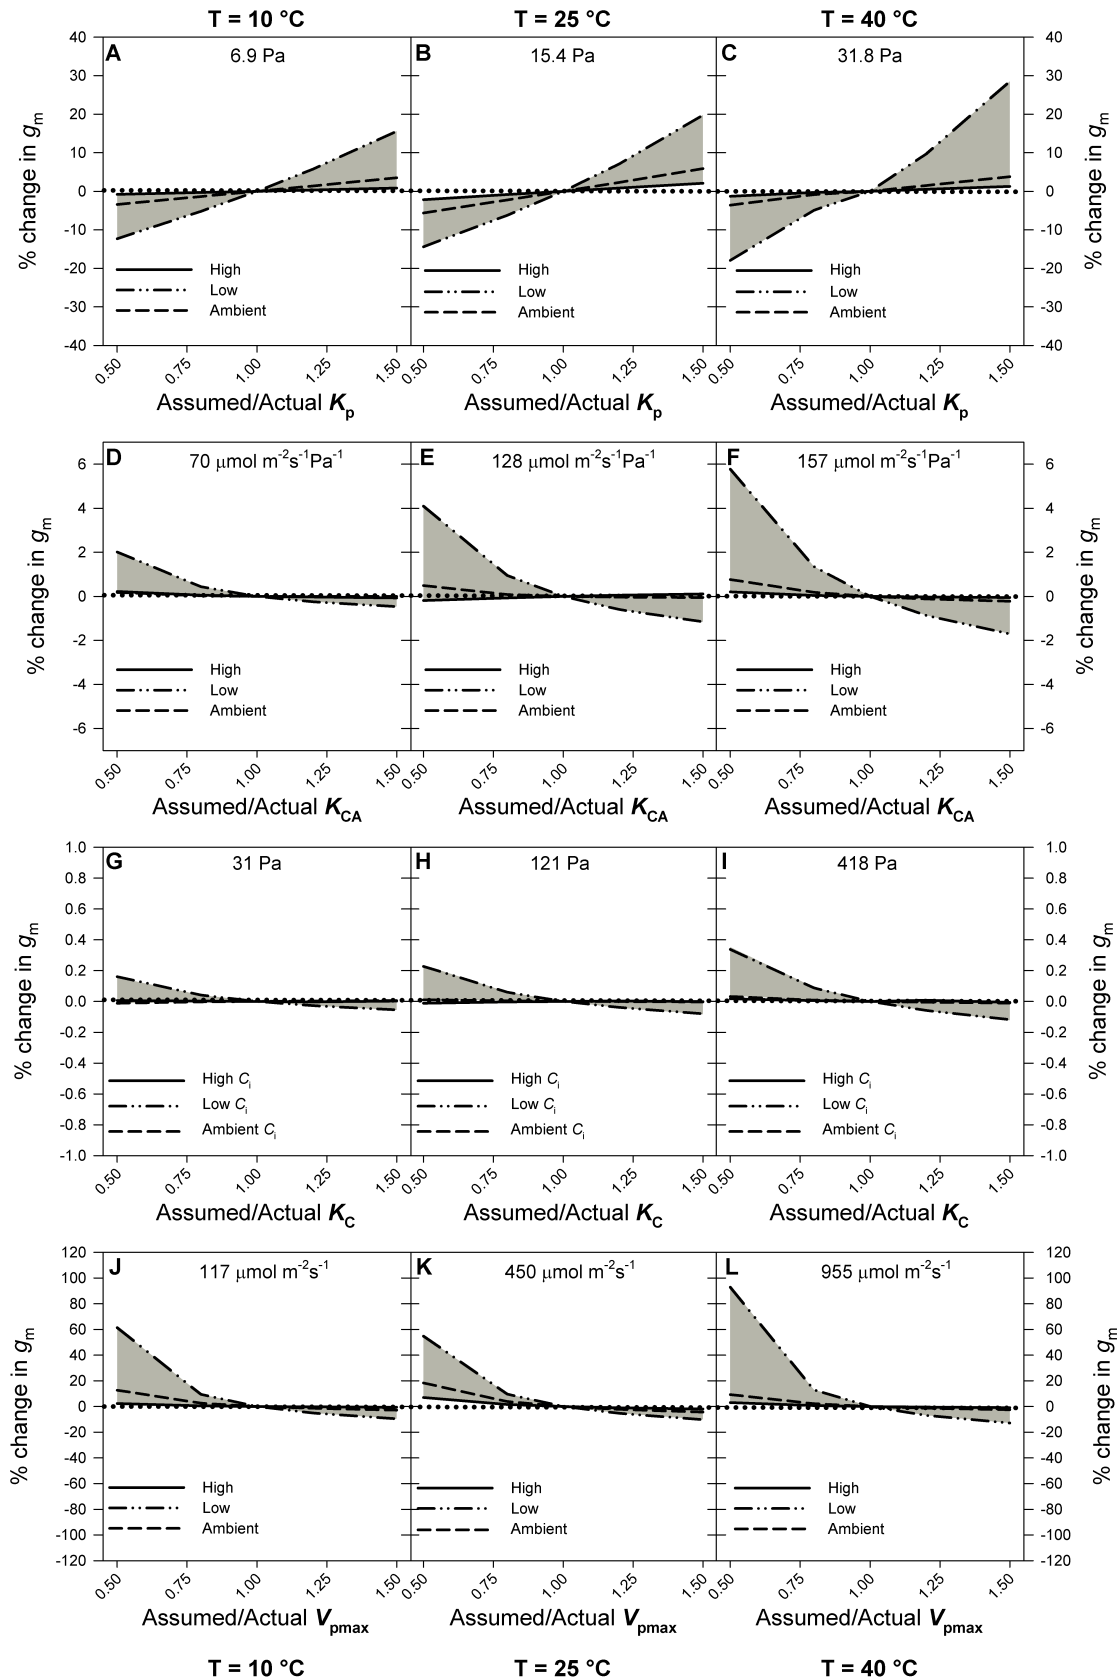



**Supplementary Figure S4.** Impact of  $R_d$  (non-photorespiratory  $\text{CO}_2$  released in the dark) and  $b'_3$  (Rubisco fractionation) in the calculation of carbonic anhydrase limited mesophyll conductance (CA-lim  $g_m$ ) in *Setaria viridis* at 25 °C. **A**) and **C**) means  $\pm$  1SE,  $n = 4$ . **B**) and **D**) % change in CA-lim  $g_m$ . The reference CA-lim  $g_m$  values for calculating the percentages were CA-lim  $g_m$  calculated with measured  $R_d$  in **B** and CA-lim  $g_m$  calculated with  $b'_3 = 30\text{‰}$  in **D**. Arrows indicate values at ambient  $p\text{CO}_2$ .

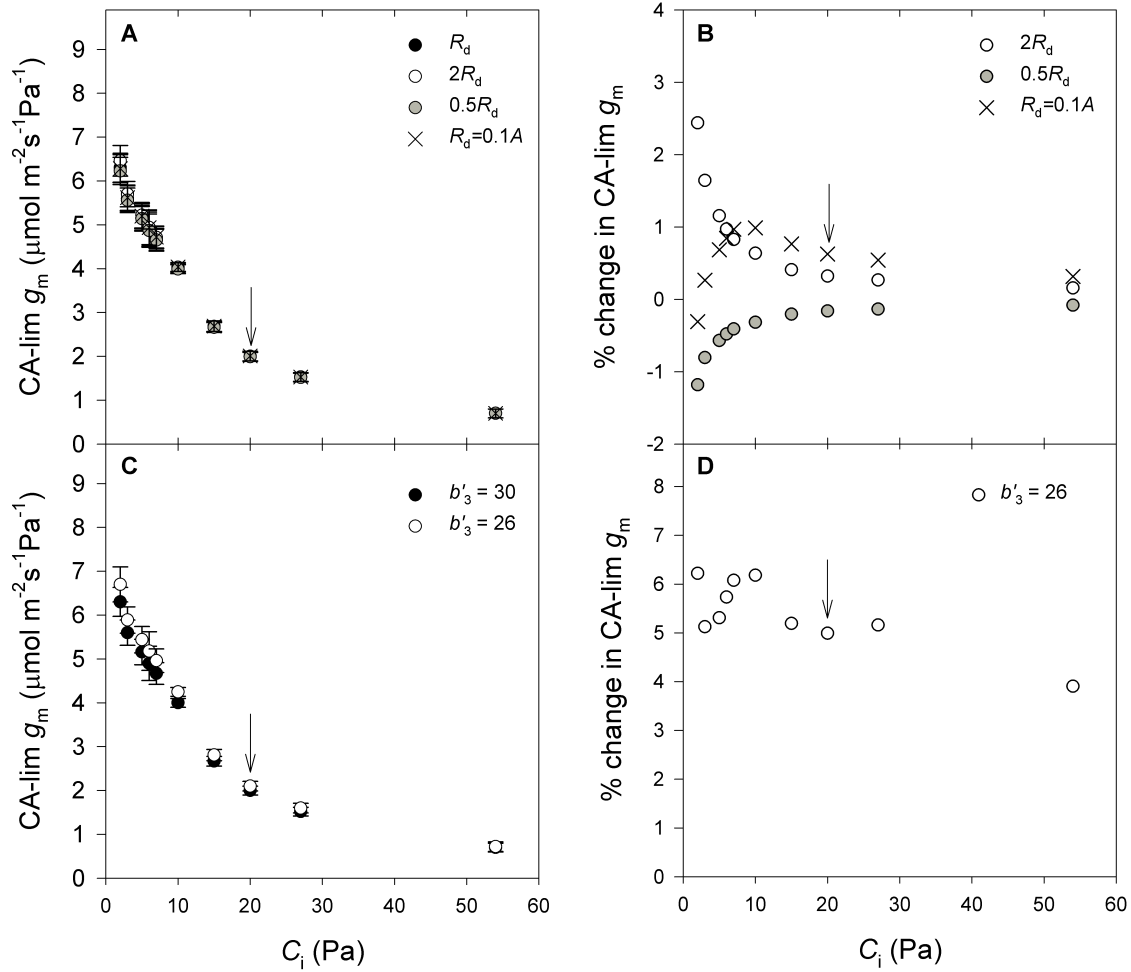

**Supplementary Figure S5.** Measured (symbols) versus modeled (black lines) response of photosynthetic rate ( $A$ ) to variation in the leaf intercellular  $\text{CO}_2$  partial pressure ( $C_i$ ) at 25 °C in *Setaria viridis* (**A, C**) and *Zea mays* (**B, D**). In *Zea*, the data are for a different set of 4 plants than the set used in the main document which includes more data points at low  $p\text{CO}_2$ . In all panels modeled  $A$  was calculated with Eqn 1, assuming CA-limiting and  $V_{\text{cmax}} \approx A_{\text{max}} + R_d$ . In panels **A** and **B** modeled  $A$  was calculated assuming  $V_{\text{pmax}} = 450$  (*Setaria*) or  $184 \mu\text{mol m}^{-2} \text{s}^{-1}$  (*Zea*) and  $C_m$  equal to  $C_i$  (solid line),  $0.5C_i$  (dashed-dotted),  $0.25C_i$  (dashed) or  $0.15C_i$  (dotted). In panels **C** and **D** modeled  $A$  was calculated assuming  $C_m = C_i$  and  $V_{\text{pmax}}$  equal to  $450 \mu\text{mol m}^{-2} \text{s}^{-1}$  (solid line),  $225 \mu\text{mol m}^{-2} \text{s}^{-1}$  (dashed-dotted),  $184 \mu\text{mol m}^{-2} \text{s}^{-1}$  (dashed) or  $92 \mu\text{mol m}^{-2} \text{s}^{-1}$  (dotted). Values are means  $\pm 1\text{SE}$ ,  $n = 4$ . The arrows indicate the values at ambient  $p\text{CO}_2$ . The grey lines in panels **A** and **B** are the function fitted to the means  $A = a(1 - e^{-bC_i}) + c$ . Function fitting was done with SigmaPlot 11.0 (Systat Software Inc., San Jose, California, USA). *Setaria*:  $a = 35.64 \pm 1.18$ ,  $b = 0.19 \pm 0.01$ ,  $c = -3.72 \pm 1.26$ ,  $r^2 = 1.00$ ,  $F(2,7) = 1059$ ,  $P < 0.0001$ . *Zea*:  $a = 30.59 \pm 0.52$ ,  $b = 0.26 \pm 0.01$ ,  $c = 1.22 \pm 0.51$ ,  $r^2 = 1.00$ ,  $F(2,9) = 2280$ ,  $P < 0.0001$ .

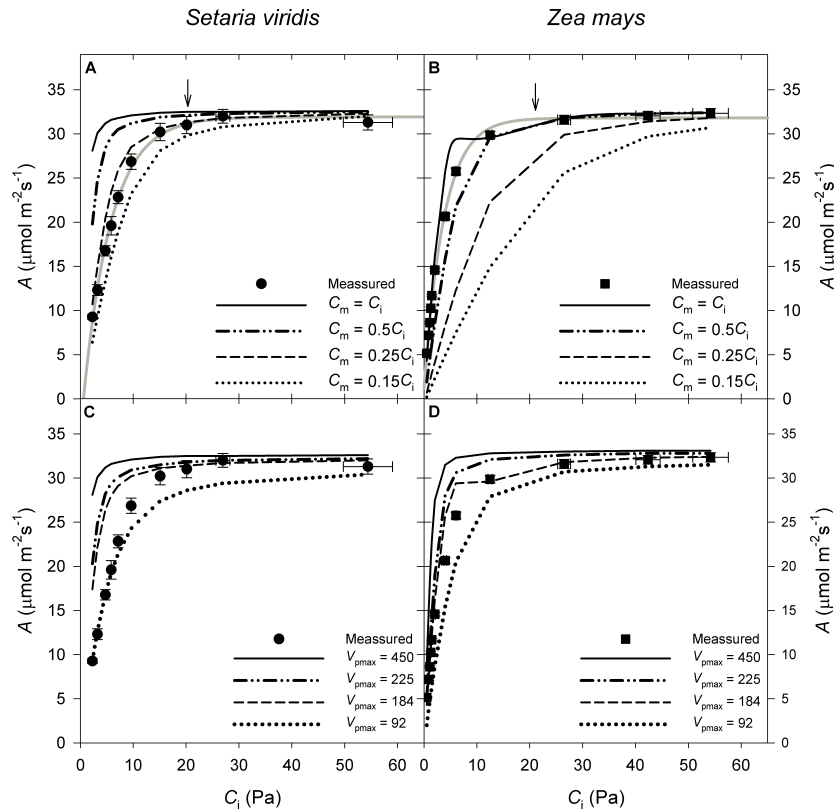

**Supplementary Figure S6.** Variation in maximum PEP carboxylation rate ( $V_{pmax}$ ,  $\mu\text{mol m}^{-2}\text{s}^{-1}$ ) across  $p\text{CO}_2$  that is required to match observations of  $A$  and  $\Delta^{13}\text{C}$  in *Setaria viridis* with their theoretical predictions assuming that mesophyll conductance (CA-lim  $g_m$ ) is constant with  $p\text{CO}_2$  and equal to  $2.7 \pm 0.3$ ,  $6.3 \pm 0.3$  and  $9.5 \pm 1.4 \mu\text{mol m}^{-2} \text{s}^{-1} \text{Pa}^{-1}$  at 10, 25, and 40 °C, respectively. These values correspond to the maximum CA-lim  $g_m$  values at each temperature derived for *Setaria viridis* with the *in-vitro*  $V_{pmax}$  method. Values are means  $\pm$  1SE,  $n = 4$ .

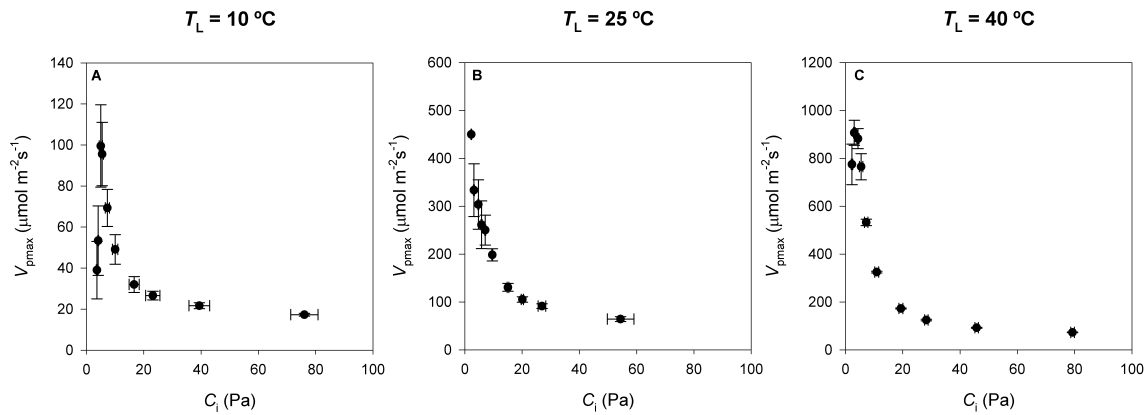

**Supplementary Figure S7.** Hydration rate ( $V_h = C_m * K_{CA}$ ) in function of  $pCO_2$  inside the leaf intercellular spaces ( $C_i$ ) in *Setaria viridis* (A) and *Zea mays* (B). Values for three leaf temperatures ( $T_L$ ) are presented in *Setaria*: 10 °C (grey circles), 25 °C (black circles) and 40 °C (white circles), and for  $T_L = 25$  °C in *Zea*. Values are means  $\pm$  1 SE,  $n = 4$  (*Setaria*) or 3 (*Zea*). The values for the rate constant of carbonic anhydrase (CA) for  $CO_2$  at 25°C are:  $K_{CA} = 65.5 \mu\text{mol m}^{-2} \text{s}^{-1} \text{Pa}^{-1}$  (*Zea*) and  $K_{CA} = 124 \mu\text{mol m}^{-2} \text{s}^{-1} \text{Pa}^{-1}$  (*Setaria*) (R.A. Boyd unpublished, Boyd *et al.*, 2015) and varying with temperature as described in Boyd *et al.* (2015).

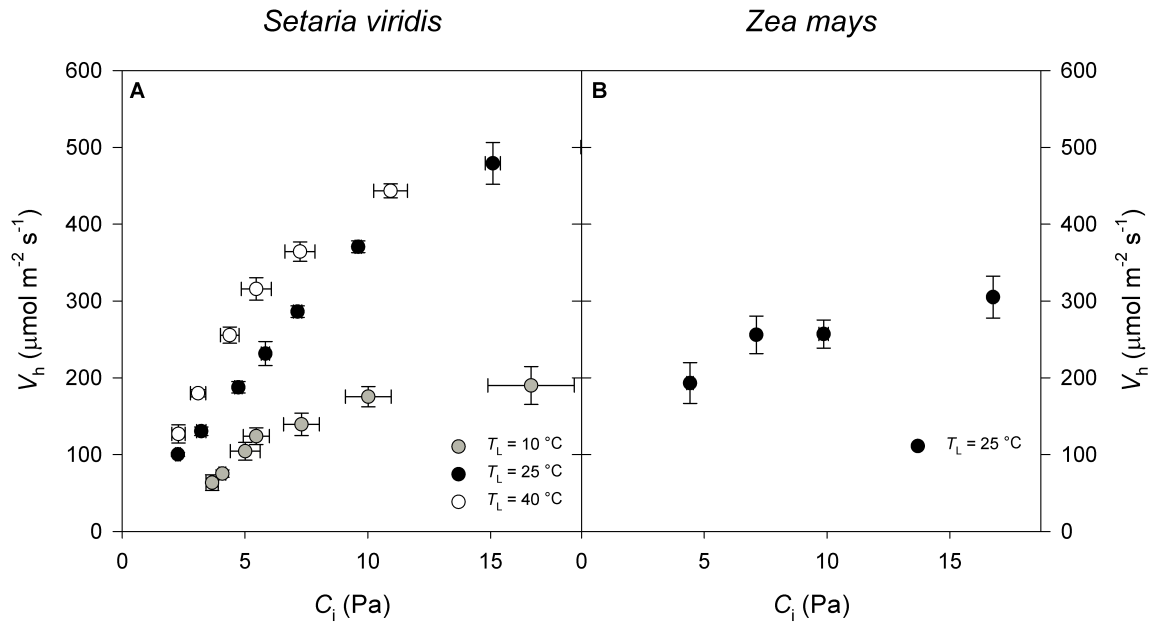

**Supplementary Figure S8.** PEP regeneration rate ( $V_{pr}$ ) as a function of  $p\text{CO}_2$  inside the leaf intercellular spaces ( $C_i$ ) needed to match observations of  $A$  and  $\Delta^{13}\text{C}$  in *Setaria viridis* with their theoretical predictions assuming that mesophyll conductance (CA-lim  $g_m$ ) is constant with  $p\text{CO}_2$  and equal to  $2.7 \pm 0.3$ ,  $6.3 \pm 0.3$  and  $9.5 \pm 1.4 \mu\text{mol m}^{-2} \text{s}^{-1} \text{Pa}^{-1}$  at 10, 25, and 40 °C, respectively. These values correspond to the maximum CA-lim  $g_m$  values derived in *Setaria viridis* at each temperature with the *in-vitro*  $V_{p\text{max}}$  method. Values are means  $\pm$  1SE,  $n = 4$ .

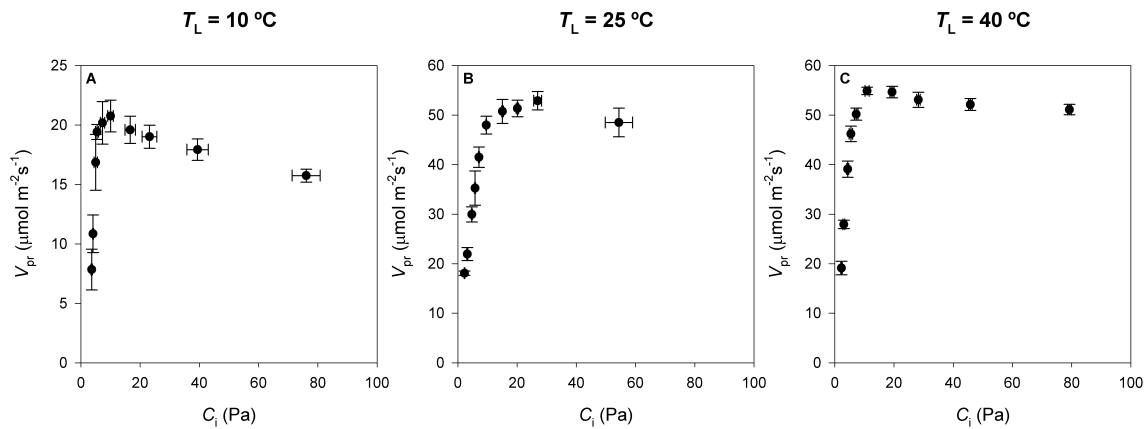

## References

- von Caemmerer S. 2000. *Biochemical models of leaf photosynthesis*. Collingwood, Australia: CSIRO publishing.
- Boyd RA, Gandin A, Cousins AB. 2015. Temperature responses of  $C_4$  photosynthesis: biochemical analysis of Rubisco, Phosphoenolpyruvate carboxylase, and Carbonic anhydrase in *Setaria viridis*. *Plant Physiology* **169**, 1850–1861.
- Ubierna N, Gandin A, Boyd RA, Cousins AB. 2017. Temperature response of mesophyll conductance in three  $C_4$  species calculated with two methods:  $^{18}\text{O}$  discrimination and *in-vitro*  $V_{p\text{max}}$ . *New Phytologist* **214**, 66-80.
