# Supplementary material for: The response of mesophyll conductance to short-term variation in CO2 in the C4 plants Setaria viridis and Zea mays
Source: PubMed Central journal article supplement (PMC6018935; doi:10.1093/jxb/erx464), 2018-02-21
Supplement: erx464_suppl_supplementary_table_1.pdf [file erx464_suppl_supplementary_table_1.pdf]

**Supplementary Table S1.** The CO<sub>2</sub> partial pressure drop between the ambient air ( $C_a$ ) and the leaf intercellular spaces ( $C_i$ ) and between  $C_i$  and the mesophyll ( $C_m$ ) expressed as a proportion of the total gradient  $C_a - C_m$  in *Setaria viridis* and *Zea mays* measured at 25 °C. The  $C_m$  was derived with the CA-limited calculations. Values for CO<sub>2</sub> assimilation rate ( $A$ ) and CA-lim  $g_m$  are also presented. Values are means  $\pm$  1SE,  $n = 4$  in *Setaria* and  $n = 3$  in *Zea*.

| $C_a$<br>Pa                          | $C_i$<br>Pa    | $C_m$<br>Pa   | $C_a - C_i$<br>% | $C_i - C_m$<br>% | $A$<br>$\mu\text{mol m}^{-2} \text{s}^{-1}$ | $g_m$<br>$\mu\text{mol m}^{-2} \text{s}^{-1} \text{Pa}^{-1}$ |
|--------------------------------------|----------------|---------------|------------------|------------------|---------------------------------------------|--------------------------------------------------------------|
| <i>Setaria viridis</i> $T_L = 25$ °C |                |               |                  |                  |                                             |                                                              |
| 4.7 $\pm$ 0.0                        | 2.3 $\pm$ 0.1  | 0.8 $\pm$ 0.0 | 62               | 38               | 9.3 $\pm$ 0.3                               | 6.30 $\pm$ 0.32                                              |
| 6.5 $\pm$ 0.1                        | 3.2 $\pm$ 0.2  | 1.0 $\pm$ 0.0 | 59               | 41               | 12.3 $\pm$ 0.6                              | 5.60 $\pm$ 0.29                                              |
| 9.3 $\pm$ 0.0                        | 4.7 $\pm$ 0.2  | 1.5 $\pm$ 0.1 | 58               | 42               | 16.8 $\pm$ 0.6                              | 5.16 $\pm$ 0.29                                              |
| 11.2 $\pm$ 0.1                       | 5.8 $\pm$ 0.2  | 1.8 $\pm$ 0.1 | 57               | 43               | 19.6 $\pm$ 1.0                              | 4.90 $\pm$ 0.39                                              |
| 13.9 $\pm$ 0.0                       | 7.1 $\pm$ 0.2  | 2.2 $\pm$ 0.1 | 58               | 42               | 22.8 $\pm$ 0.7                              | 4.67 $\pm$ 0.25                                              |
| 18.5 $\pm$ 0.1                       | 9.6 $\pm$ 0.1  | 2.9 $\pm$ 0.1 | 57               | 43               | 26.9 $\pm$ 0.9                              | 4.00 $\pm$ 0.10                                              |
| 27.9 $\pm$ 0.1                       | 15.1 $\pm$ 0.3 | 3.8 $\pm$ 0.2 | 53               | 47               | 30.2 $\pm$ 1.0                              | 2.67 $\pm$ 0.11                                              |
| 37.3 $\pm$ 0.1                       | 20.1 $\pm$ 0.4 | 4.6 $\pm$ 0.1 | 53               | 47               | 31.0 $\pm$ 1.0                              | 2.00 $\pm$ 0.10                                              |
| 56.0 $\pm$ 0.2                       | 27.0 $\pm$ 1.3 | 5.8 $\pm$ 0.4 | 58               | 42               | 32.0 $\pm$ 0.8                              | 1.52 $\pm$ 0.10                                              |
| 92.8 $\pm$ 0.2                       | 54.4 $\pm$ 4.6 | 7.8 $\pm$ 1.1 | 45               | 55               | 31.3 $\pm$ 0.9                              | 0.70 $\pm$ 0.10                                              |
| <i>Zea mays</i> $T_L = 25$ °C        |                |               |                  |                  |                                             |                                                              |
| 9.4 $\pm$ 0.0                        | 4.4 $\pm$ 0.1  | 3.0 $\pm$ 0.4 | 77               | 23               | 19.7 $\pm$ 1.0                              | 16.20 $\pm$ 5.74                                             |
| 13.9 $\pm$ 0.0                       | 7.1 $\pm$ 0.0  | 3.9 $\pm$ 0.4 | 68               | 32               | 24.9 $\pm$ 1.0                              | 7.92 $\pm$ 1.18                                              |
| 18.6 $\pm$ 0.1                       | 9.9 $\pm$ 0.2  | 3.9 $\pm$ 0.3 | 60               | 40               | 27.4 $\pm$ 0.5                              | 4.64 $\pm$ 0.31                                              |
| 35.5 $\pm$ 0.1                       | 16.8 $\pm$ 0.1 | 4.7 $\pm$ 0.4 | 61               | 39               | 29.3 $\pm$ 0.4                              | 2.43 $\pm$ 0.13                                              |
| 56.0 $\pm$ 0.3                       | 24.8 $\pm$ 1.4 | 5.2 $\pm$ 1.0 | 61               | 39               | 26.4 $\pm$ 0.8                              | 1.36 $\pm$ 0.12                                              |
| 84.1 $\pm$ 0.4                       | 34.1 $\pm$ 2.0 | 9.6 $\pm$ 1.5 | 67               | 33               | 25.6 $\pm$ 0.9                              | 1.07 $\pm$ 0.13                                              |
| 112.1 $\pm$ 0.6                      | 48.3 $\pm$ 4.9 | 6.9 $\pm$ 1.0 | 61               | 39               | 24.4 $\pm$ 0.0                              | 0.60 $\pm$ 0.07                                              |
